# Supplementary material
Source: publisher figshare collection journal article supplement (https://future-science-group.figshare.com/ndownloader/files/31257862)

***Figure IIs - PRISMA of Clinical Trial***


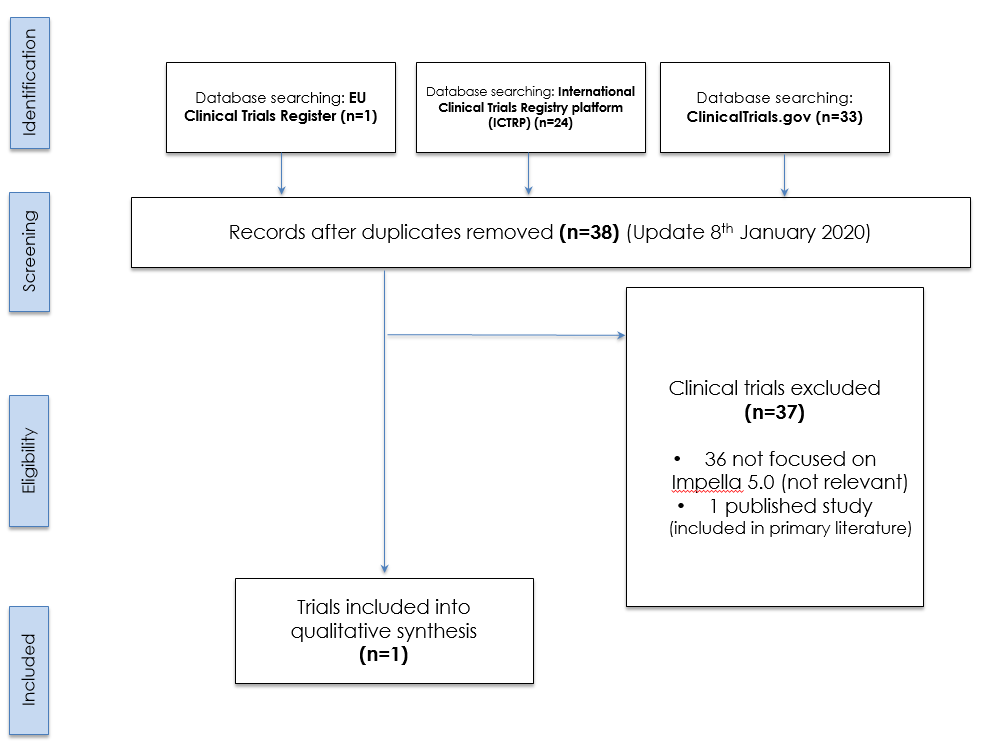

Supplement: Supplementary file 1 [file 31257862]
